RESEARCH ARTICLE

# Prostaglandin E<sub>2</sub> from *Candida albicans* Stimulates the Growth of *Staphylococcus aureus* in Mixed Biofilms

Jan Krause<sup>‡</sup>, Gernot Geginat, Ina Tammer\*

Institute of Medical Microbiology, Hospital Control and Prevention, Otto-von-Guericke University, Magdeburg, Germany

<sup>‡</sup> Current address: Department for Abdominal, Vascular, Thoracic and General Surgery, AMEOS Hospital, Aschersleben, Germany

\* [ina.tammer@med.ovgu.de](mailto:ina.tammer@med.ovgu.de)

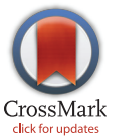

## Abstract

### Background

Previous studies showed that *Staphylococcus aureus* and *Candida albicans* interact synergistically in dual species biofilms resulting in enhanced mortality in animal models.

### Methodology/Principal Findings

The aim of the current study was to test possible candidate molecules which might mediate this synergistic interaction in an *in vitro* model of mixed biofilms, such as farnesol, tyrosol and prostaglandin (PG) E<sub>2</sub>. In mono-microbial and dual biofilms of *C. albicans* wild type strains PGE<sub>2</sub> levels between 25 and 250 pg/mL were measured. Similar concentrations of purified PGE<sub>2</sub> significantly enhanced *S. aureus* biofilm formation in a mode comparable to that observed in dual species biofilms. Supernatants of the null mutant deficient in PGE<sub>2</sub> production did not stimulate the proliferation of *S. aureus* and the addition of the cyclooxygenase inhibitor indomethacin blocked the *S. aureus* biofilm formation in a dose-dependent manner. Additionally, *S. aureus* biofilm formation was boosted by low and inhibited by high farnesol concentrations. Supernatants of the farnesol-deficient *C. albicans* ATCC10231 strain significantly enhanced the biofilm formation of *S. aureus* but at a lower level than the farnesol producer SC5314. However, *C. albicans* ATCC10231 also produced PGE<sub>2</sub> but amounts were significantly lower compared to SC5314.

### Conclusion/Significance

In conclusion, we identified *C. albicans* PGE<sub>2</sub> as a key molecule stimulating the growth and biofilm formation of *S. aureus* in dual *S. aureus*/*C. albicans* biofilms, although *C. albicans* derived farnesol, but not tyrosol, may also contribute to this effect but to a lesser extent.

## OPEN ACCESS

**Citation:** Krause J, Geginat G, Tammer I (2015) Prostaglandin E<sub>2</sub> from *Candida albicans* Stimulates the Growth of *Staphylococcus aureus* in Mixed Biofilms. PLoS ONE 10(8): e0135404. doi:10.1371/journal.pone.0135404

**Editor:** Chaminda Jayampath Seneviratne, National University of Singapore, SINGAPORE

**Received:** April 1, 2015

**Accepted:** July 21, 2015

**Published:** August 11, 2015

**Copyright:** © 2015 Krause et al. This is an open access article distributed under the terms of the [Creative Commons Attribution License](https://creativecommons.org/licenses/by/4.0/), which permits unrestricted use, distribution, and reproduction in any medium, provided the original author and source are credited.

**Data Availability Statement:** All relevant data are within the paper and its Supporting Information files.

**Funding:** The authors have no support or funding to report.

**Competing Interests:** The authors have declared that no competing interests exist.

## Introduction

The first study suggesting a specific interaction between *Staphylococcus* (*S.*) *aureus* and *Candida* (*C.*) *albicans* was published in 1976 [1]. Since then, a number of studies corroborated this result and showed a synergistic interaction of *S. aureus* and *C. albicans* with enhanced mortality in animal models [2–4].

*In vitro* studies of complex microbial communities show that intra-species and inter-species interactions are mediated via small molecules released into the extracellular environment, i.e. quorum sensing molecules, extracellular virulence factors, or secondary metabolites [5–7].

*Candida albicans* regulates virulence traits through the production of at least two quorum-sensing (QS) signal molecules, *E,E*-farnesol and tyrosol, both affecting dimorphism and biofilm formation in *C. albicans* [8–10]. Furthermore, *C. albicans* farnesol down-regulates the production of pyocyanin in *Pseudomonas* (*P.*) *aeruginosa* [11] and inhibits biofilm formation and lipase activity in *S. aureus* [12,13].

*Candida albicans* is a commensal microorganism in healthy individuals but is capable of causing disseminated or chronic infections when the host mucosal barrier is breached and the immune response is inadequate. *In vivo*, inflammation is mediated by the production of eicosanoids including prostaglandins and leukotrienes. Prostaglandin E<sub>2</sub> (PGE<sub>2</sub>), an oxygenated metabolite of arachidonic acid, is known to regulate the activation, maturation, cytokine release and migration of the mammalian cells, particularly those involved in innate immunity [14–18]. Interestingly, *C. albicans* produces authentic PGE<sub>2</sub> from external arachidonic acid [19], which is upregulated during biofilm formation suggesting that PGE<sub>2</sub> may represent a significant virulence factor in biofilm-associated infections.

In order to evaluate the possible effect of PGE<sub>2</sub> on bacterial biofilms, we established a *S. aureus*/*C. albicans* dual species biofilm model. Using this model we were able to replace the stimulatory activity of *C. albicans* on *S. aureus* by synthetic purified PGE<sub>2</sub>, suggesting that this metabolite plays an important role in the interaction of *S. aureus* and *C. albicans* in biofilms.

## Material and Methods

### *Staphylococcus aureus* and *C. albicans* strains

The following strains were used in this study: *Staphylococcus* (*S.*) *aureus* 31883 small colony variant (SCV) strain isolated from a sputum sample of a patient suffering from cystic fibrosis; *S. aureus* 19552 clinical isolate derived from the throat of a cystic fibrosis patient (non-SCV phenotype); *Candida* (*C.*) *albicans* 31883 isolated from a sputum sample of a patient suffering from cystic fibrosis; *C. albicans* ATCC10231 wild type (wt) strain (laboratory strain; farnesol-deficient); *C. albicans* SC5314 wt strain (laboratory strain; farnesol producer, [20]); *C. albicans* M35 (prototrophic reference strain; same as CAF2-1, but *ura3*-/*URA3* [21]); *C. albicans* M134 (prototrophic reference strain; same as CAI4, but *ura3*-/*rps1*::*URA3/RPS*; [22]; further *ura3*-/-); *C. albicans* M1096 (prototrophic; same as CAI4, but *ura3*-/*fet31*-/*URA3*; [23]; further *ura3*-/*fet31*-/-).

Clinical isolates were cultured from routine diagnostic samples which were sent to the Institute of Medical Microbiology. The samples were processed in the diagnostic laboratory under the special guidance of the author as described below. After homogenization with sterile saline (1:1) the sputum samples were plated on various agar plates and incubated at 37°C and at 30°C for two days, respectively, and at 25°C for further three days. The throat swabs were processed in a similar manner without homogenization. After visible growth the colonies were identified by the use of mass spectrometry (Vitek2 MS; Biomerieux, France) according to the instructions of the manufacturer. All strains identified from patients with cystic fibrosis were routinely stored at -70°C using the Microbank system as recommended by the manufacturer (Bestbion; Colonia, Germany).

For the use in this study, clinical strains were cultured from the Microbank system on Columbia agar plates containing 5% sheep blood (Beckton Dickinson) and incubated over night at 37°C. Subcultures on blood agar plates were incubated for further 24h under the same conditions. From these subcultures glycerin stocks (99.9%; Calbiochem, Heidelberg, Germany) were prepared and stored at -70°C until further use.

### Dual *S. aureus*/*C. albicans* biofilms

Three to five *S. aureus* colonies grown from glycerin stocks were inoculated in 5mL tryptic soy broth (TSB-T; Biomerieux, Nürtingen, Germany) and incubated over night at 37°C with agitation of 180 rpm. *C. albicans* cells from glycerin stocks were propagated overnight in 100mL Yeast peptone dextrose (YPD) medium (Sigma, Hannover; Germany) at 30°C on an orbital shaker at 180 rpm. Under these conditions all strains grow in the budding yeast phase. *Candida* cells were harvested by centrifugation, washed twice in sterile phosphate buffered saline (1xPBS; Sigma), re-suspended and adjusted to a cellular density equivalent to 3x10<sup>6</sup> cells/mL. *S. aureus* cells were adjusted to an optical density of 0.02 in RPMI1640 using a spectrophotometer (Eppendorf, Hamburg, Germany) which is equivalent to approximately 3x10<sup>6</sup> cells/mL [24]. One mL of each microbial suspension was added to each well of a 12-well plate (Greiner, Frickenhausen, Germany). Biofilms were incubated in RPMI1640 buffered with HEPES and supplemented with L-glutamine and 10% heat-inactivated fetal bovine serum (FBS; Thermo Fisher Scientific, Schwerte, Germany) for the appropriate time at 37°C with 75 rpm of agitation in humid atmosphere. Medium was changed daily. Under these conditions *S. aureus* and *C. albicans* formed stable and reproducible mono-microbial and mixed biofilms which was tested using one-way ANOVA (analysis of variance) as described elsewhere [25,26]. After the appropriate time of incubation supernatants were removed. Biofilms were scraped from the bottom of the wells and homogenized with Sputasol liquid (50µg/mL; Thermo Fisher) as described by Efthimiadis et al. [27]. Cells were collected by centrifugation (1100xg for 5 min) and washed twice in sterile PBS. The inoculum was confirmed by quantitative culture (serial diluted 10-fold) on mannitol salt agar (MSA2 agar; Biomerieux) after 24h of incubation at 37°C for *S. aureus* or on Chromagar CANDIDA (BD) after 48h at 30°C for *C. albicans*.

### Crystal violet staining

Mono-microbial and mixed biofilms were stained with crystal violet (CV) solution as described by Peeters et al. [28]. Briefly, biofilms cultured in 96-well plates were fixed with methanol. Then, 0.2% crystal violet solution was added to each well and incubated for 20 min at room temperature. Excess CV was removed by washing under running tap water and bounded CV was released by 33% acetic acid (Sigma). Absorbance was measured at 570 nm.

### Determination of the prostaglandin concentration

Prostaglandin E<sub>2</sub> (PGE<sub>2</sub>) production was measured from supernatants of different mono-microbial and dual biofilms using a monoclonal PGE<sub>2</sub> enzyme-linked immunosorbent assay (ELISA; Cayman Chemicals, Ann Arbor, USA) according to the instructions of the manufacturer. Supernatants were collected from the biofilms after the appropriate time point, centrifuged at 8000xg, filtered twice by using a 0.22 µm syringe filter (Roth, Karlsruhe, Germany) and stored at -80°C. To confirm, that the supernatants yielded no living cells of *S. aureus* and *C. albicans*, 100 µl of the supernatants were plated onto blood agar plates and incubated for 48h at 37°C and for further 48h at 30°C. All supernatants processed by this method were cell-free. In serum, PGE<sub>2</sub> is rapidly degraded into unstable intermediates [19], i.e. 15-keto-13, 14-dihydro-PGE<sub>2</sub>, which were determined with a PGE<sub>2</sub> metabolite kit (Cayman Chemicals).

The PGE<sub>2</sub> metabolite kit converts the unstable intermediates into stable measurable derivative serving as marker for the PGE<sub>2</sub> production. Background levels of PGE<sub>2</sub> detected in RPMI 1640 with and without FBS were subtracted from experimental samples.

### Purified substances

Purified tyrosol, farnesol and prostaglandin E<sub>2</sub> (PGE<sub>2</sub>) were purchased from Sigma-Aldrich. Stock solutions of tyrosol (2-4-hydroxyphenylethanol) and farnesol were dissolved in DMSO. PGE<sub>2</sub> stock solution (1mg/mL) was prepared in ethanol and further diluted in 1xPBS. Established 24h old *S. aureus* biofilms were incubated overnight in the presence of the appropriate drugs, biofilms were harvested and the numbers of colony forming units (cfu`s) were determined as described above. Control experiments revealed that DMSO and ethanol did not affect to the growth of *S. aureus* and *C. albicans*.

### Inhibitors

The cyclooxygenase inhibitor indomethacin (Sigma) was dissolved in dimethyl sulfoxide (stock solution 1mM) and further diluted in PBS prior to addition to mixed biofilms. Dual biofilms without supplements or with DMSO alone were used as control. DMSO did not influence the growth of the biofilms.

### Statistical analysis

Data represent the mean plus the standard deviation of two independent experiments with three intra-assay replicates.

Statistical significance was determined using Student's t-test with SigmaStat statistical software (version 2.0). *P*-values  $\leq 0.05$  were considered statistically significant.

### Ethics statement

According to the written decision of the clinical research ethics committee of the Otto-von-Guericke University of Magdeburg the current study did not require approval by the local ethics committee because no human material or data attributable to individual patients were used.

## Results

### Stimulation of *S. aureus* by *C. albicans* in mixed biofilms

Initial mixed biofilm experiments with clinical strains of *S. aureus* and *C. albicans* showed that biofilm thickness of mixed biofilms was significantly increased compared with *S. aureus* mono-microbial biofilms (Fig 1A).

Mixed biofilms yielded a significantly higher number of *S. aureus* colony forming units (cfu`s) compared to mono-microbial *S. aureus* biofilms with a dramatically increase after 72h of co-culture (Fig 1B).

In order to investigate, if the growth-stimulating effect of *C. albicans* depends on the direct contact of bacteria to the hyphal network, 24h old *S. aureus* biofilms were incubated with cell-free supernatants from *C. albicans* 31883 and SC5314 diluted 1:1 with fresh medium (Fig 2A). The number of cfu`s of *S. aureus* increased 10-fold when supernatants derived from 72h or 96h old *C. albicans* biofilms were added. The strongest increase was observed with supernatants from *C. albicans* SC5314. Remarkably, the stimulatory activity of supernatants was heat-labile. Incubation of *S. aureus* with heat-treated supernatants from *C. albicans* mono-microbial biofilms did not promote the propagation of *S. aureus* (Fig 2B).

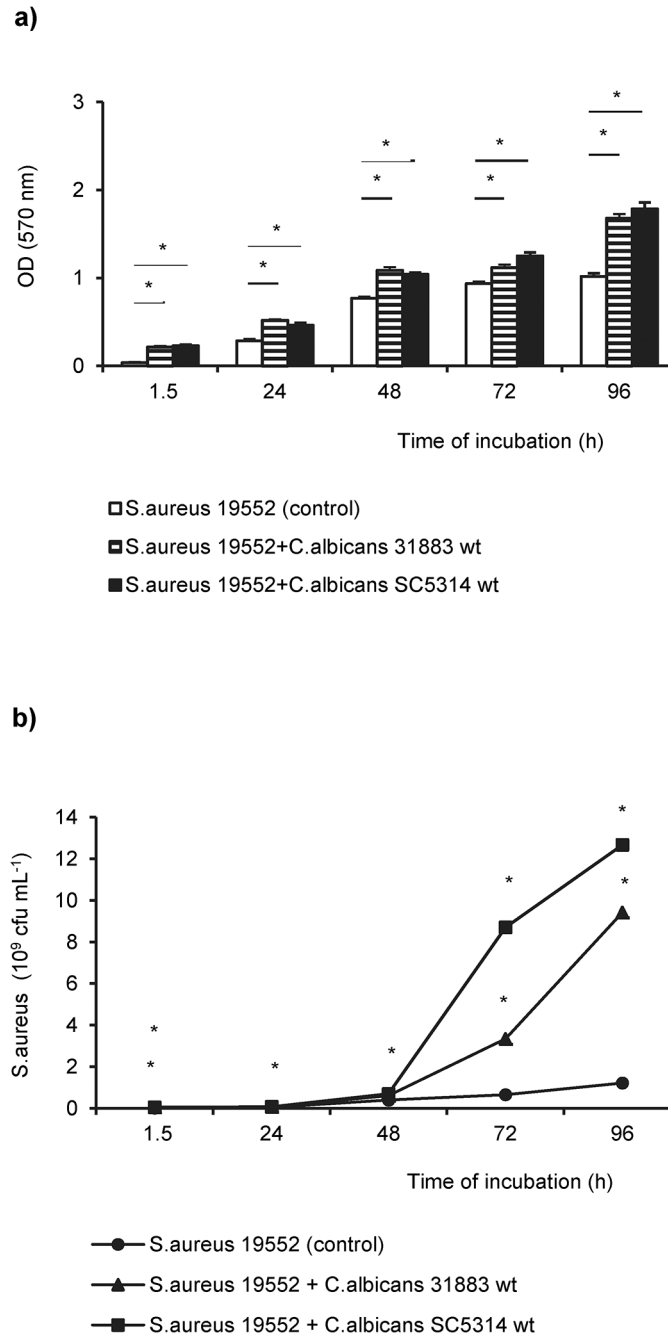

**Fig 1. Growth kinetics of *S.aureus* in mono-microbial and in dual *S.aureus/C.albicans* biofilms.** (a) Biofilm thickness of *S.aureus* 19552 single (open bars) and mixed biofilms with *C.albicans* 31883 wt (clinical strain; striped) or *C.albicans* SC5314 wt (laboratory strain; solid bars) at various time points determined by staining with crystal violet. Total biofilm thickness is expressed as mean of the optical density (OD) measured at a wave length of 570 nm. Shown are the means and standard deviations of two independent experiments with 24 replicates each. (b) Quantification of *S.aureus* 19552 in mono-microbial (circle) and in dual species biofilms together with *C.albicans* clinical isolate 31883 (triangle) or *C.albicans* SC5314 laboratory strain (square). Shown are the mean cfu's of *S.aureus* derived from two representative experiments with three intra-assay replicates. Asterisks indicate significant ( $p < 0.001$ ) differences between mono-microbial and dual species biofilms.

doi:10.1371/journal.pone.0135404.g001

### Subinhibitory concentrations of farnesol promote biofilm formation of *S. aureus*

In order to further define the growth-promoting activity of *C. albicans* culture supernatants the effect of a number of molecules secreted by *C. albicans* such as farnesol, tyrosol and prostaglandin E<sub>2</sub> (PGE<sub>2</sub>), were tested.

a)

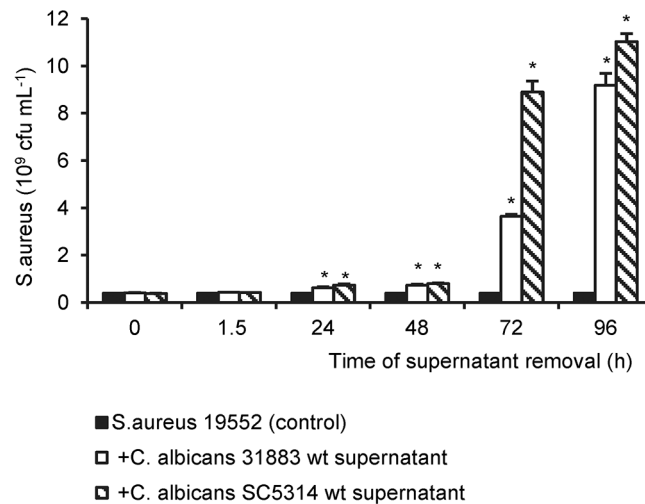

b)

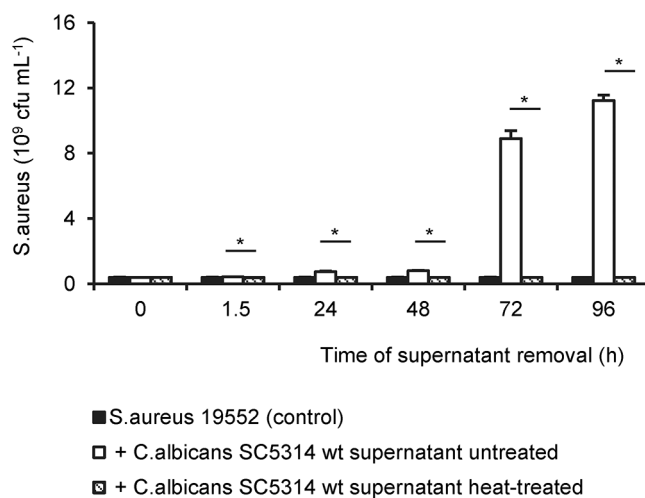

**Fig 2. Growth-promoting properties of cell-free *C. albicans* supernatants.** (a) Supernatants removed from biofilms of two *C. albicans* wild type strains SC5314 and 31883, respectively, after the indicated time of incubation were added to 24h old biofilms of *S. aureus* 19552. (b) Heat-treated (striped) and untreated supernatants (open bars) were collected as described above and added to 24h-old *S. aureus* biofilms. *S. aureus* grown as mono-microbial biofilm was used as control (solid bars). Shown are the mean cfu and the standard deviations of two independent experiments each with three replicates. Asterisks indicate statistically significant differences ( $p < 0.001$ ).

doi:10.1371/journal.pone.0135404.g002

Synthetic farnesol at concentrations between 5 and 0.5 nM (Fig 3A), but not purified tyrosol, stimulated the growth of *S. aureus* in biofilms, whereas concentrations  $\geq 0.5 \mu\text{M}$  significantly reduced the growth of *S. aureus* (S1 Fig).

The application of supernatants from cultures of both *C. albicans* SC5314 (farnesol producer) and ATCC10231 (farnesol nonproducer) significantly enhanced the growth rates of *S. aureus* (Fig 3B). Interestingly, the farnesol-producing strain exhibited a stronger impact to the growth and biofilm formation of *S. aureus* than the farnesol-negative isolate.

### Purified PGE<sub>2</sub> stimulates growth of *S. aureus* in biofilms

Next step was to analyze the effect of purified PGE<sub>2</sub> on 24h old *S. aureus* biofilms. As shown in Fig 4A, purified PGE<sub>2</sub> significantly enhanced *S. aureus* biofilm formation in a dose-dependent manner. The stimulatory activity of purified PGE<sub>2</sub> was neutralized by heating treatment of the PGE<sub>2</sub> solution (Fig 4B).

### *C. albicans* PGE<sub>2</sub>-deficient mutant strain do not stimulate growth of *S. aureus*

PGE<sub>2</sub> and its metabolites were abundantly detected in culture supernatants of *C. albicans* wt and reference strains, and their amount increased according to the *C. albicans* cell density.

In contrast, PGE<sub>2</sub> levels of the *C. albicans* null mutant (*ura3*<sup>-/-</sup>*-fet31*<sup>-/-</sup>), deficient in the multi-copper oxidase genes *fet31*, were below the detection limit of the assay (Fig 5A and S2 Fig).

The concentration of purified PGE<sub>2</sub> inducing the growth of *S. aureus* were similar to the PGE<sub>2</sub> levels measured in supernatants of *C. albicans* mono-microbial biofilms (Figs 4A and 5A).

To test the hypothesis that PGE<sub>2</sub> is responsible for the stimulatory effect of *C. albicans* on *S. aureus* biofilms, the effect of cell-free supernatants derived from PGE<sub>2</sub> producers (*C. albicans* SC5314 and *C. albicans ura3*<sup>-/-</sup>) and from the PGE<sub>2</sub> nonproducer (*C. albicans ura3*<sup>-/-</sup>*-fet31*<sup>-/-</sup>) to the growth of *S. aureus* was investigated (Fig 5B). Supernatants derived from the PGE<sub>2</sub>-deficient mutant were unable to stimulate the growth of *S. aureus*.

Interestingly, the farnesol producer *C. albicans* SC5314 secreted significantly higher levels of PGE<sub>2</sub> than the farnesol-deficient strain ATCC10231 (Fig 5C).

### Treatment of mixed biofilms with indomethacin reduced growth of *S. aureus*

In addition, we tested whether the nonspecific cyclooxygenase inhibitor indomethacin can influences the stimulatory activity of *C. albicans* to *S. aureus*. Indomethacin at a concentration between 10 and 1000 pg/mL efficiently blocked the biosynthesis of PGE<sub>2</sub> (Fig 6A) and its metabolites (Fig 6B) by *C. albicans*. In cultures of mixed *S. aureus*/*C. albicans* biofilms indomethacin significantly suppressed the growth of *S. aureus* in a dose-dependent manner (Fig 6C).

Experiments performed with the *S. aureus* small colony variant 31338 revealed similar results.

Neither DMSO nor Indomethacin significantly affected the growth of *S. aureus* or *C. albicans*. Data are exemplarily represented for *S. aureus* 19552 and *C. albicans* SC5314 (S3 Fig).

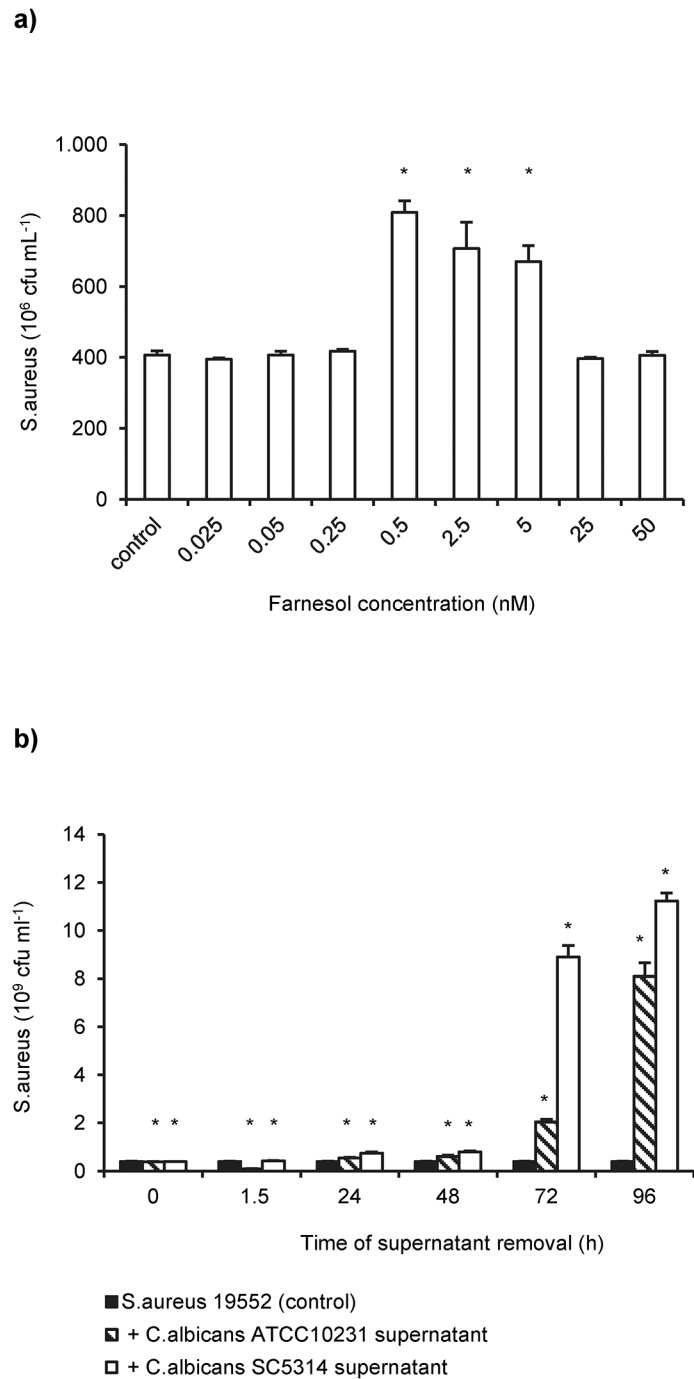

**Fig 3. Effect of farnesol on the growth of *S. aureus* 19552 in mono-microbial biofilms.** (a) Pre-cultured 24h old *S. aureus* biofilms were supplemented with different concentrations of purified farnesol and the number of cfu's was determined. *S. aureus* biofilms incubated in farnesol-free medium were used as control. (b) Growth kinetics of *S. aureus* in dual biofilms with the farnesol-deficient *C. albicans* strain ATCC10231 (striped) and the farnesol producer *C. albicans* SC5314 (open bars). Colony forming units (cfu's) of *S. aureus* derived from single species biofilms were function as control (solid bars). Shown are the mean cfu's and the standard deviations of two representative experiments with three replicates each. Asterisks indicate significant ( $p < 0.05$ ) differences compared to controls.

doi:10.1371/journal.pone.0135404.g003



### *S. aureus* does not stimulate the PGE<sub>2</sub> synthesis in *C. albicans*

The levels of PGE<sub>2</sub> and of the PGE<sub>2</sub> metabolites were not enhanced in dual biofilms of *S. aureus* and *C. albicans* wild type strains compared with *C. albicans* mono-microbial biofilms, indicating that *S. aureus* did not stimulate the release of PGE<sub>2</sub> from *C. albicans* isolates (S4 Fig).

a)

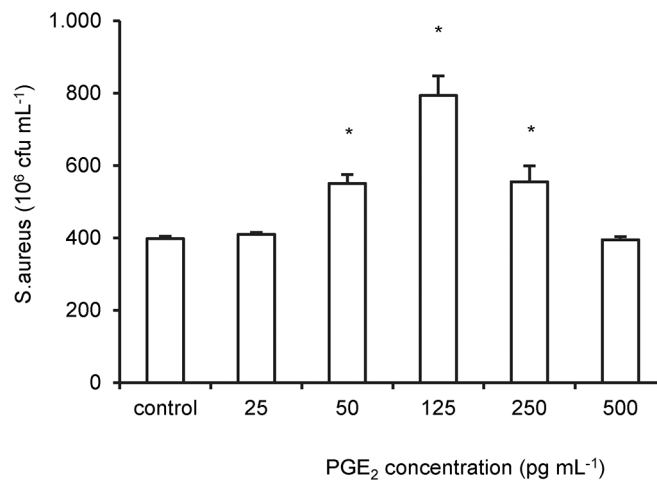

b)

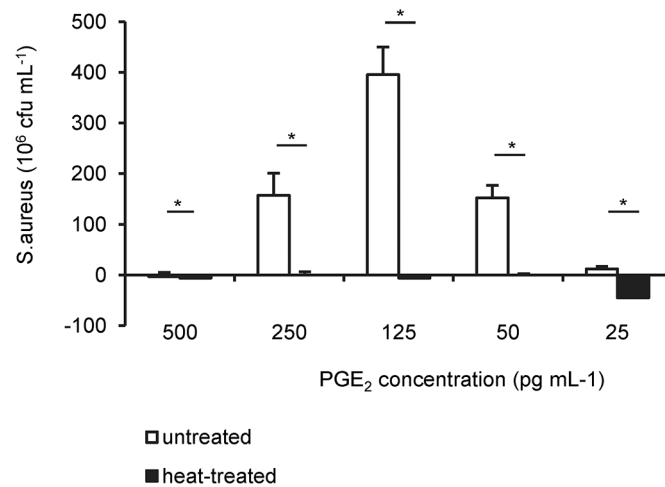

**Fig 4. PGE<sub>2</sub> stimulates the growth of *S. aureus* biofilms.** (a) *S. aureus* 19552 was grown in single species biofilms in the presence of various concentrations of purified PGE<sub>2</sub>. The mean number of colony forming units (cfu's) from untreated *S. aureus* biofilms were used as control. Asterisks indicate statistically significant (p < 0.05) differences between PGE<sub>2</sub>-treated and untreated biofilms. (b) Cultures of *S. aureus* 19552 biofilms were supplemented with heat-treated (solid bars) and untreated (open bars) PGE<sub>2</sub> supplemented medium. Shown are the mean number of *S. aureus* cfu's normalized to the non-supplemented control as well as the standard deviations derived from two independent experiments and three replicates per experiment. Asterisks indicate significant (p < 0.05) differences between the groups.

doi:10.1371/journal.pone.0135404.g004

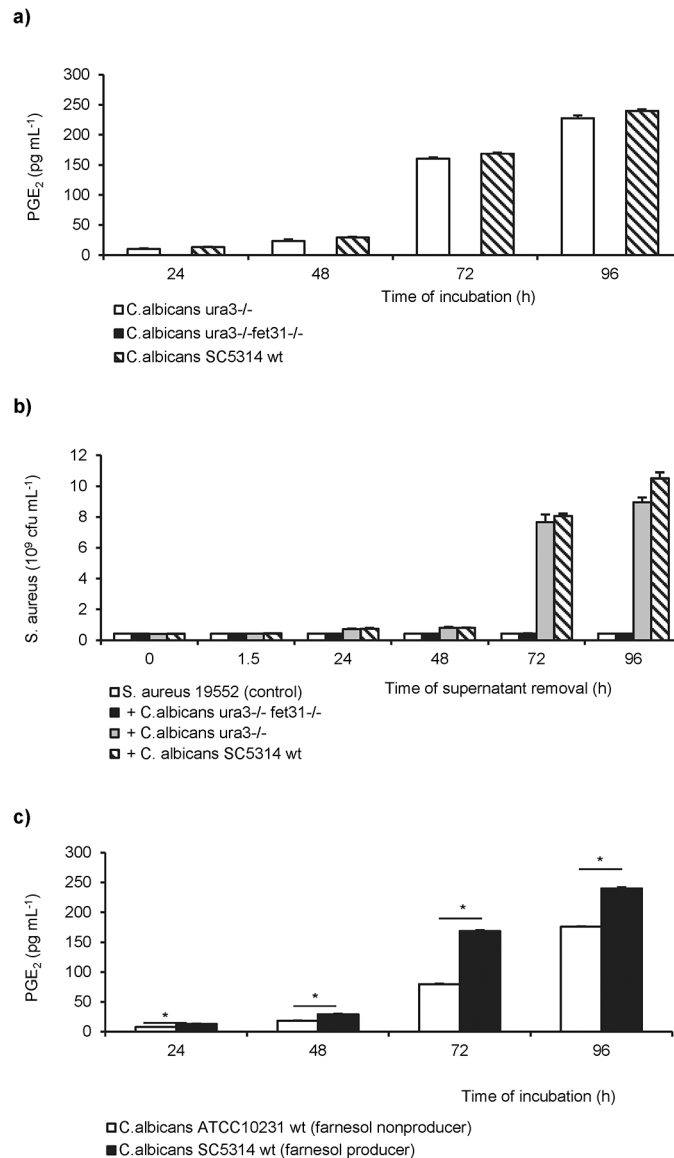

**Fig 5. PGE<sub>2</sub> synthesis in *C. albicans* wild type and mutant strains and its effect on *S. aureus* biofilms.** (a) Time-dependent accumulation of PGE<sub>2</sub> in culture supernatants of the *C. albicans* SC5314 wt (dashed), the reference strain *ura3-/-* (open bars), and the null mutant *ura3-/-fet31-/-* (solid bars) measured by EIA. (b) Effect of cell-free supernatants derived from *C. albicans* SC5314 wt (striped), from the reference (grey bars) and from the null mutant (solid bars) to the growth of established *S. aureus* 19552 biofilms (control; open bars) after further 24h of incubation. (c) PGE<sub>2</sub> levels in supernatants of *C. albicans* ATCC10231 (farnesol nonproducer; open bars) and SC5314 (farnesol producer; solid bars) were compared. Mean and standard deviations derived from two representative experiments with three replicates per test are demonstrated. Significant differences ( $p < 0.001$ ) between the two groups were identified by asterisks.

doi:10.1371/journal.pone.0135404.g005

## Discussion

In polymicrobial infections, biofilm formation is the predominant mode of life [29–31]. Biofilms are structured microbial communities attached to biotic or abiotic surfaces and embedded in a matrix of exopolymers to withstand the host immune response and exhibit increased resistance to antimicrobial agents [32–35]. It is estimated that 27% of nosocomial *C. albicans*

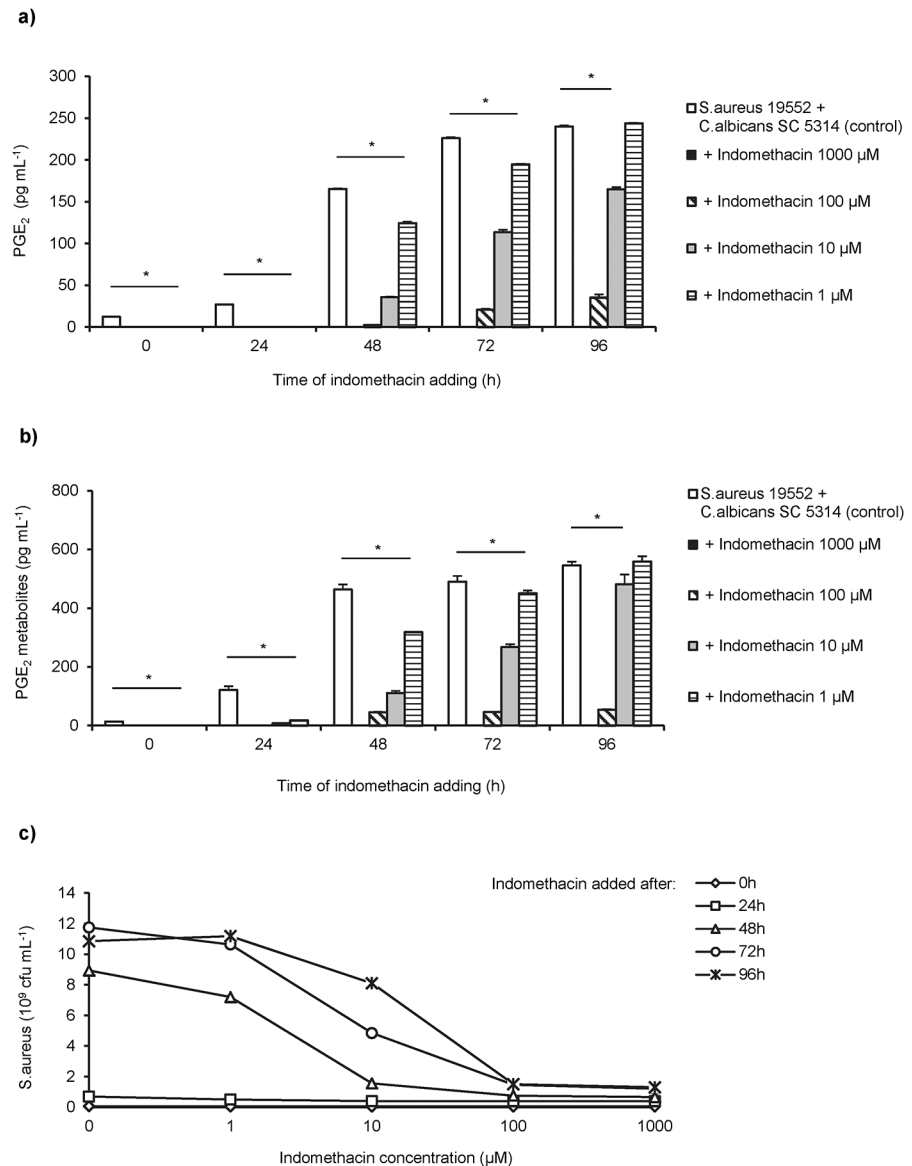

**Fig 6. Indomethacin suppresses the stimulatory effect of *C. albicans* on *S. aureus* biofilms.** (a) Indomethacin was added to mixed biofilms of *S. aureus* 19552 and *C. albicans* SC5314 pre-cultured for different periods. PGE<sub>2</sub> synthesis was measured in supernatants from indomethacin-treated and untreated (control) dual biofilms by monoclonal and (b) metabolite EIA. Asterisks indicate significant differences between indomethacin-treated cultures and untreated controls. (c) The number of *S. aureus* cfu's was quantified in mixed *S. aureus*/*C. albicans* biofilms after addition of graded doses of indomethacin at the indicated time points. Untreated dual species biofilms were used as control. Shown are the results of two representative experiments with three intra-assay replicates.

doi:10.1371/journal.pone.0135404.g006

bloodstream infections are polymicrobial, with *S. aureus* as the third most common organism isolated in conjunction with *C. albicans* [36].

*In vitro* studies demonstrated that the formation of *S. aureus* biofilms on abiotic materials in the presence of serum requires pre-coating and nutrient supplementation [37]. In order to study the interactions between *C. albicans* and *S. aureus* in mono-microbial and dual species biofilms, we have optimized an *in vitro* biofilm model of infection. Using this model, we observed increased growth rates of *S. aureus* in dual biofilms in the presence of *C. albicans*. In

*vitro* studies described the formation of *S. aureus* microcolonies on the surface of biofilms with *C. albicans* serving as the underlying scaffolding [38,39]. The adherence of *S. aureus* on fungal hyphae was mediated by the *Candida* agglutinin-like protein 3 (Als3p; [40]). Studies of the protein expression during the growth of dual *C. albicans*/*S. aureus* biofilms identified 27 differentially regulated proteins, mostly involved in growth, metabolism, or stress response. Among the down-regulated staphylococcal proteins was the global transcriptional repressor of virulence factors, CodY, suggesting that the enhanced pathogenesis of *S. aureus* may not only be due to physical interactions [41,42].

Staib et al. [1] hypothesized the potential existence of *C. albicans* end-products as a substratum for a favorable growth of *S. aureus*. One of the *C. albicans* products continuously excreted in the environment is farnesol a quorum sensing molecule involved in the regulation of the fungal yeast-mycelium dimorphism. At high levels, farnesol has been shown to exhibit antimicrobial activity against various pathogens [12]. Kaneko et al. reported growth inhibition of *S. aureus* at concentrations of 40  $\mu\text{g mL}^{-1}$  (equivalent to 180  $\mu\text{M}$ ) which is concordant with our results [43]. In this study, subinhibitory concentrations of farnesol (0.5–5 nM) promoted the biofilm formation of *S. aureus*, an effect already described for several antimicrobial agents [44–47]. In stationary phase cultures of *C. albicans*, farnesol accumulated at levels between 2 and 4  $\mu\text{M}$  [8,48]. In addition, our data showed that *S. aureus* biofilm production was propagated by the farnesol-deficient *C. albicans* strain ATCC 10231 albeit at a lower level compared to the farnesol producer *C. albicans* SC5314, whereas the PGE<sub>2</sub> null mutant did not enhanced the growth of *S. aureus*. Unlike SC5314, ATCC10231 excreted significantly lower levels of PGE<sub>2</sub> in this experimental setting indicating that the differences in the growth-stimulating effect to *S. aureus* resulted from the PGE<sub>2</sub> levels. In conclusion, it appears that PGE<sub>2</sub> has a superior role in the induction of *S. aureus* biofilm formation as compared to farnesol, which, however, also supports the growth of *S. aureus* at low concentrations.

We demonstrated for the first time that *C. albicans* PGE<sub>2</sub> may be one of the suggested end-products presumed by Staib [1]. As shown in this study, the stimulatory effect to the growth of *S. aureus* was not observed, when *C. albicans* supernatants or medium supplemented with purified PGE<sub>2</sub> were heat treated suggesting that PGE<sub>2</sub> is heat-sensitive. This observation is concordant with the results described by Carlson who reported increased mortality rates of mice co-infected with sublethal doses of *C. albicans* and *S. aureus* [3]. This effect could not be reproduced when either of the agents was heat inactivated.

Endogenous PGE<sub>2</sub> maintains the integrity of the mucosal barrier in the lungs and in the gastrointestinal tract [49–51]. Mucus accumulation and overexpression of inflammatory response genes are relevant pathogenic features of cystic fibrosis (CF), a genetic disorder caused by mutations in the cystic fibrosis transmembrane conductance regulator gene *cftr* [52]. Recently, Harmon et al. demonstrated a defective peroxisome proliferator-activated receptor (PPAR $\gamma$ ) function in epithelial cells which was caused by the decreased conversion of PGE<sub>2</sub> to the PPAR $\gamma$  ligand 15-keto-PGE<sub>2</sub> leading to the accumulation of PGE<sub>2</sub> [51]. As elevated levels of PGE<sub>2</sub> have been detected in respiratory tract samples of patients suffering from cystic fibrosis [53,54] and in consideration of the results from this study, it seems to be possible that enhanced PGE<sub>2</sub> levels may contribute to the early airway colonization due to *S. aureus* in patients with CF.

PGE<sub>2</sub> was demonstrated to induce germ tube formation and to be involved in biofilm formation by *C. albicans* [55,56] suggesting *C. albicans* PGE<sub>2</sub> to be a potential virulence factor. Despite induced endocytosis by host cells at the early stage of infection, hyphal mediated active penetration of the host tissue is the major route of invasion [57,58]. Tissue invasion by *C. albicans* is associated with cytokine secretion, inducing host immune response mechanisms. Phagocytosis by macrophages and neutrophils represents the first line of defense against

*Candida* infections but intracellular killing is not always effective. One of the underlying mechanisms is the inhibition of the phagosome maturation and the nitric oxid (NO) production in macrophages after infection with *C. albicans* [59], an effect that may be resulted from candidal PGE<sub>2</sub> excretion.

PGE<sub>2</sub> is a critical molecule that regulates the activation, maturation, migration, and cytokine secretion of several immune cells, particular those of the innate immunity. In the context of infection, endogenous PGE<sub>2</sub> inhibits the cytolytic effector function of natural killer (NK) cells, the activation, migration and production of proteolytic enzymes in granulocytes and limits the phagocytosis and pathogen-killing function of alveolar macrophages (reviewed by [14,18]. Aronoff et al. reported the negative regulatory role of endogenously produced and exogenously added PGE<sub>2</sub> on FcRγ-mediated phagocytosis of bacterial pathogens by alveolar macrophages suggesting that PGE<sub>2</sub> derived from *C. albicans* may impair the local host innate immunity [60]. This suggestion is underlined by the investigations of Roux et al. who had shown that airway colonization with *C. albicans* inhibited phagocytosis of *S. aureus* and *P. aeruginosa* and enhanced the prevalence of bacterial pneumonia, which was reduced by antifungal treatment [61,62].

Mice inoculated with either *S. aureus* or *C. albicans* survived infection, whereas combined infection with both pathogens enhanced the mortality rate to 40–100% [3,4]. Reversely, enhanced microbial clearance and survival was demonstrated in studies with COX-2-deficient mice [63–65]. This is in line with our observation that a mutant strain of *C. albicans* deficient in PGE<sub>2</sub> production did not promote the growth of *S. aureus*. Furthermore, in this study the non-selective cyclooxygenase (COX) inhibitor indomethacin that blocked PGE<sub>2</sub> biosynthesis by *C. albicans* also reduced the growth of *S. aureus* in dual biofilms to a level observed in mono-microbial *S. aureus* biofilms.

Thus, treatment with indomethacin or with antifungal agents may exhibit several positive effects in patients with dual *S. aureus*/*C. albicans* infections [51,60–62].

Finally, in this study *S. aureus* did not enhanced the biofilm thickness of *C. albicans* and its PGE<sub>2</sub> synthesis in dual biofilms compared with mono-microbial *C. albicans* biofilms, although bacterial peptidoglycan-derived molecules have been shown to promote *C. albicans* hyphal growth [66,67]. Thus, in mixed biofilms the impact of *S. aureus* to *C. albicans* remained unclear.

## Conclusion

Our findings indicate that PGE<sub>2</sub> is the key molecule stimulating the growth and biofilm formation of *S. aureus* in dual *S. aureus*/*C. albicans* biofilms, although subinhibitory farnesol concentrations may also support this effect. Candidal PGE<sub>2</sub> may exhibit a dual effect in *S. aureus*/*C. albicans* polymicrobial biofilms, first, by promoting fungal hyphal formation and second, by providing a proper substratum for the proliferation of *S. aureus*. Further characterization of the intricate interaction between these pathogens is warranted, as it may aid in the design of further therapeutic strategies against polymicrobial biofilm infections.

## Supporting Information

**S1 Fig. Effect of farnesol on the growth of *S. aureus*.**

(TIF)

**S2 Fig. PGE<sub>2</sub> metabolite synthesis in *C. albicans* wt strains.**

(TIF)

**S3 Fig. Indomethacin and DMSO does not affect the growth of (a) *S. aureus* or (b) *C. albicans*.**

(TIF)

**S4 Fig. *S. aureus* does not stimulate the PGE<sub>2</sub> synthesis in *C. albicans*.**

(TIF)

## Acknowledgments

We thank Sascha Brunke (Hans Knoell Institute, Jena, Germany) for generously providing us with *C. albicans* M35, M134 and M1096 strains.

## Author Contributions

Conceived and designed the experiments: IT. Performed the experiments: JK IT. Analyzed the data: IT JK GG. Contributed reagents/materials/analysis tools: JK IT GG. Wrote the paper: IT GG JK.

## References

1. Staib F, Grosse G, Mishra SK. Staphylococcus aureus and Candida albicans infection (animal experiments). Zentralbl Bakteriell. 1976; 234: 450–461.
2. deRepentigny J, Levesque R, Mathieu LG. Increase in the in vitro susceptibility of Staphylococcus aureus to antimicrobial agents in the presence of Candida albicans. Can J Microbiol. 1979; 25: 429–435. PMID: [385127](#)
3. Carlson E. Synergistic effect of Candida albicans and Staphylococcus aureus on mouse mortality. Infect Immun. 1982; 38: 921–924. PMID: [7152678](#)
4. Peters BM, Noverr MC. Candida albicans-Staphylococcus aureus polymicrobial peritonitis modulates host innate immunity. Infect Immun. 2013; 81: 2178–2189. doi: [10.1128/IAI.00265-13](#) PMID: [23545303](#)
5. Hogan DA, Vik A, Kolter R. A Pseudomonas aeruginosa quorum-sensing molecule influences Candida albicans morphology. Mol Microbiol. 2004; 54: 1212–1223. PMID: [15554963](#)
6. Kerr JR. Suppression of fungal growth exhibited by Pseudomonas aeruginosa. J Clin Microbiol. 1994; 32: 525–527. PMID: [8150966](#)
7. Gupta N, Haque A, Mukhopadhyay G, Narayan RP, Prasad R. Interactions between bacteria and Candida in the burn wound. Burns. 2005; 31: 375–378. PMID: [15774298](#)
8. Hornby JM, Jensen EC, Lisek AD, Tasto JJ, Jahnke B, Shoemaker R, et al. Quorum sensing in the dimorphic fungus Candida albicans is mediated by farnesol. Appl Environ Microbiol. 2001; 67:2982–2992. PMID: [11425711](#)
9. Ramage G, Saville SP, Wickes BL, Lopez-Ribot JL. Inhibition of Candida albicans biofilm formation by farnesol, a quorum-sensing molecule. Appl Environ Microbiol. 2002; 68: 5459–5463. PMID: [12406738](#)
10. Alem MA, Oteef MD, Flowers TH, Douglas LJ. Production of tyrosol by Candida albicans biofilms and its role in quorum sensing and biofilm development. Eukaryot Cell. 2006; 5: 1770–1779. PMID: [16980403](#)
11. Cugini C, Calfee MW, Farrow JM III, Morales DK, Pesci EC, Hogan DA. Farnesol, a common sesquiterpene, inhibits PQS production in Pseudomonas aeruginosa. Mol Microbiol. 2007; 65: 896–906. PMID: [17640272](#)
12. Jabra-Rizk MA, Meiller TF, James CE, Shirtliff ME. Effect of farnesol on Staphylococcus aureus biofilm formation and antimicrobial susceptibility. Antimicrob Agents Chemother. 2006; 50: 1463–1469. PMID: [16569866](#)
13. Kuroda M, Nagasaki S, Ito R, Ohta T. Sesquiterpene farnesol as a competitive inhibitor of lipase activity of Staphylococcus aureus. FEMS Microbiol Lett. 2007; 273: 28–34. PMID: [17559400](#)
14. Agard M, Asakrah S, Morici LA. PGE(2) suppression of innate immunity during mucosal bacterial infection. Front Cell Infect Microbiol. 2013; 3: 45. doi: [10.3389/fcimb.2013.00045](#) PMID: [23971009](#)
15. Obermajer N, Wong JL, Edwards RP, Odunsi K, Moysich K, Kalinski P. PGE(2)-driven induction and maintenance of cancer-associated myeloid-derived suppressor cells. Immunol Invest. 2012; 41: 635–657. doi: [10.3109/08820139.2012.695417](#) PMID: [23017139](#)

16. Bankhurst AD. The modulation of human natural killer cell activity by prostaglandins. *J Clin Lab Immunol.* 1982; 7: 85–91. PMID: [6951051](#)
17. Goto T, Herberman RB, Maluish A, Strong DM. Cyclic AMP as a mediator of prostaglandin E-induced suppression of human natural killer cell activity. *J Immunol.* 1983; 130: 1350–1355. PMID: [6185577](#)
18. Kalinski P. Regulation of Immune Responses by Prostaglandin E-2. *Journal of Immunology* 2012; 188: 21–28.
19. Erb-Downward JR, Noverr MC. Characterization of prostaglandin E2 production by *Candida albicans*. *Infect Immun.* 2007; 75: 3498–3505. PMID: [17470538](#)
20. Gillum AM, Tsay EY, Kirsch DR. Isolation of the *Candida albicans* gene for orotidine-5'-phosphate decarboxylase by complementation of *S. cerevisiae* *ura3* and *E. coli* *pyrF* mutations. *Mol Gen Genet.* 1984; 198: 179–182. PMID: [6394964](#)
21. Fonzi WA, Irwin MY. Isogenic strain construction and gene mapping in *Candida albicans*. *Genetics* 1993; 134: 717–728. PMID: [8349105](#)
22. Fradin C, De Groot P, Mac Callum D, Schaller M, Klis F, Odds FC, et al. Granulocytes govern the transcriptional response, morphology and proliferation of *Candida albicans* in human blood. *Mol Microbiol.* 2005; 56: 397–415. PMID: [15813733](#)
23. Eck R, Hundt S, Hartl A, Roemer E, Kunkel W. A multicopper oxidase gene from *Candida albicans*: cloning, characterization and disruption. *Microbiology* 1999; 145 (Pt 9): 2415–2422. PMID: [10517594](#)
24. Musken M, Di FS, Romling U, Haussler S. A 96-well-plate-based optical method for the quantitative and qualitative evaluation of *Pseudomonas aeruginosa* biofilm formation and its application to susceptibility testing. *Nat Protoc.* 2010; 5: 1460–1469. doi: [10.1038/nprot.2010.110](#) PMID: [20671729](#)
25. Harrison JJ, Stremick CA, Turner RJ, Allan ND, Olson ME, Ceri H. Microtiter susceptibility testing of microbes growing on peg lids: a miniaturized biofilm model for high-throughput screening. *Nat Protoc.* 2010; 5: 1236–1254. doi: [10.1038/nprot.2010.71](#) PMID: [20595953](#)
26. Chen P, Abercrombie JJ, Jeffrey NR, Leung KP. An improved medium for growing *Staphylococcus aureus* biofilm. *J Microbiol Methods.* 2012; 90: 115–118. doi: [10.1016/j.mimet.2012.04.009](#) PMID: [22542521](#)
27. Efthimiadis A, Spanevello A, Hamid Q, Kelly MM, Linden M, Louis R, et al. Methods of sputum processing for cell counts, immunocytochemistry and in situ hybridisation. *Eur Respir J Suppl.* 2002; 37: 19s–23s. PMID: [12361358](#)
28. Peeters E, Nelis HJ, Coenye T. Comparison of multiple methods for quantification of microbial biofilms grown in microtiter plates. *J Microbiol Methods.* 2008; 72: 157–165. PMID: [18155789](#)
29. Douglas LJ. *Candida* biofilms and their role in infection. *Trends Microbiol.* 2003; 11: 30–36. PMID: [12526852](#)
30. El-Azizi MA, Starks SE, Khardori N. Interactions of *Candida albicans* with other *Candida* spp. and bacteria in the biofilms. *J Appl Microbiol.* 2004; 96: 1067–1073. PMID: [15078523](#)
31. Costerton JW, Stewart PS, Greenberg EP. Bacterial biofilms: a common cause of persistent infections. *Science* 1999; 284: 1318–1322. PMID: [10334980](#)
32. Ramage G, Bachmann S, Patterson TF, Wickes BL, Lopez-Ribot JL. Investigation of multidrug efflux pumps in relation to fluconazole resistance in *Candida albicans* biofilms. *J Antimicrob Chemother.* 2002; 49: 973–980. PMID: [12039889](#)
33. Ramage G, Vandewalle K, Bachmann SP, Wickes BL, Lopez-Ribot JL. In vitro pharmacodynamic properties of three antifungal agents against preformed *Candida albicans* biofilms determined by time-kill studies. *Antimicrob Agents Chemother.* 2002; 46: 3634–3636. PMID: [12384379](#)
34. Ramage G, Wickes BL, Lopez-Ribot JL. Biofilms of *Candida albicans* and their associated resistance to antifungal agents. *Am Clin Lab.* 2001; 20: 42–44. PMID: [11570274](#)
35. Lewis K. Riddle of biofilm resistance. *Antimicrobial Agents and Chemotherapy.* 2001; 45: 999–1007. PMID: [11257008](#)
36. Klotz SA, Chasin BS, Powell B, Gaur NK, Lipke PN. Polymicrobial bloodstream infections involving *Candida* species: analysis of patients and review of the literature. *Diagn Microbiol Infect Dis.* 2007; 59: 401–406. PMID: [17888612](#)
37. Cassat JE, Lee CY, Smeltzer MS. Investigation of biofilm formation in clinical isolates of *Staphylococcus aureus*. *Methods Mol Biol.* 2007; 391: 127–144. PMID: [18025674](#)
38. Harriott MM, Noverr MC. *Candida albicans* and *Staphylococcus aureus* form polymicrobial biofilms: effects on antimicrobial resistance. *Antimicrob Agents Chemother.* 2009; 53: 3914–3922. doi: [10.1128/AAC.00657-09](#) PMID: [19564370](#)
39. Carlson E, Johnson G. Protection by *Candida albicans* of *Staphylococcus aureus* in the establishment of dual infection in mice. *Infect Immun.* 1985; 50: 655–659. PMID: [3905609](#)

40. Peters BM, Ovchinnikova ES, Krom BP, Schlecht LM, Zhou H, Hoyer LL, et al. Staphylococcus aureus adherence to Candida albicans hyphae is mediated by the hyphal adhesin Als3p. *Microbiology* 2012; 158: 2975–2986. doi: [10.1099/mic.0.062109-0](https://doi.org/10.1099/mic.0.062109-0) PMID: [22918893](https://pubmed.ncbi.nlm.nih.gov/22918893/)
41. Ovchinnikova ES, Krom BP, Busscher HJ, van der Mei HC. Evaluation of adhesion forces of Staphylococcus aureus along the length of Candida albicans hyphae. *BMC Microbiol.* 2012; 12: 281. doi: [10.1186/1471-2180-12-281](https://doi.org/10.1186/1471-2180-12-281) PMID: [23181353](https://pubmed.ncbi.nlm.nih.gov/23181353/)
42. Peters BM, Jabra-Rizk MA, Scheper MA, Leid JG, Costerton JW, Shirtliff ME. Microbial interactions and differential protein expression in Staphylococcus aureus-Candida albicans dual-species biofilms. *FEMS Immunol Med Microbiol.* 2010; 59: 493–503. doi: [10.1111/j.1574-695X.2010.00710.x](https://doi.org/10.1111/j.1574-695X.2010.00710.x) PMID: [20608978](https://pubmed.ncbi.nlm.nih.gov/20608978/)
43. Kaneko M, Togashi N, Hamashima H, Hirohara M, Inoue Y. Effect of farnesol on mevalonate pathway of Staphylococcus aureus. *J Antibiot (Tokyo)* 2011; 64: 547–549.
44. Tammer I, Reuner J, Hartig R, Geginat G. Induction of Candida albicans biofilm formation on silver-coated vascular grafts. *J Antimicrob Chemother.* 2014; 69: 1282–1285. doi: [10.1093/jac/dkt521](https://doi.org/10.1093/jac/dkt521) PMID: [24448486](https://pubmed.ncbi.nlm.nih.gov/24448486/)
45. Kaplan JB, Jabbouri S, Sadvovskaya I. Extracellular DNA-dependent biofilm formation by Staphylococcus epidermidis RP62A in response to subminimal inhibitory concentrations of antibiotics. *Res Microbiol.* 2011; 162: 535–541. doi: [10.1016/j.resmic.2011.03.008](https://doi.org/10.1016/j.resmic.2011.03.008) PMID: [21402153](https://pubmed.ncbi.nlm.nih.gov/21402153/)
46. Kaplan JB. Antibiotic-induced biofilm formation. *Int J Artif Organs.* 2011; 34: 737–751. doi: [10.5301/ijao.5000027](https://doi.org/10.5301/ijao.5000027) PMID: [22094552](https://pubmed.ncbi.nlm.nih.gov/22094552/)
47. Kuhn DM, George T, Chandra J, Mukherjee PK, Ghannoum MA. Antifungal susceptibility of Candida biofilms: unique efficacy of amphotericin B lipid formulations and echinocandins. *Antimicrob Agents Chemother.* 2002; 46: 1773–1780. PMID: [12019089](https://pubmed.ncbi.nlm.nih.gov/12019089/)
48. Hornby JM, Nickerson KW. Enhanced production of farnesol by Candida albicans treated with four azoles. *Antimicrob Agents Chemother.* 2004; 48: 2305–2307. PMID: [15155241](https://pubmed.ncbi.nlm.nih.gov/15155241/)
49. Takeuchi K, Kato S, Amagase K. Prostaglandin EP receptors involved in modulating gastrointestinal mucosal integrity. *J Pharmacol Sci.* 2010; 114: 248–261. PMID: [21041985](https://pubmed.ncbi.nlm.nih.gov/21041985/)
50. Bozyk PD, Moore BB. Prostaglandin E2 and the pathogenesis of pulmonary fibrosis. *Am J Respir Cell Mol Biol.* 2011; 45: 445–452. doi: [10.1165/rcmb.2011-0025RT](https://doi.org/10.1165/rcmb.2011-0025RT) PMID: [21421906](https://pubmed.ncbi.nlm.nih.gov/21421906/)
51. Harmon GS, Dumlao DS, Ng DT, Barrett KE, Dennis EA, Dong H, et al. Pharmacological correction of a defect in PPAR-gamma signaling ameliorates disease severity in Cfr-deficient mice. *Nat Med.* 2010; 16: 313–318. doi: [10.1038/nm.2101](https://doi.org/10.1038/nm.2101) PMID: [20154695](https://pubmed.ncbi.nlm.nih.gov/20154695/)
52. Boucher RC. Airway surface dehydration in cystic fibrosis: pathogenesis and therapy. *Annu Rev Med.* 2007; 58: 157–170. PMID: [17217330](https://pubmed.ncbi.nlm.nih.gov/17217330/)
53. Lucidi V, Ciabattoni G, Bella S, Barnes PJ, Montuschi P. Exhaled 8-isoprostane and prostaglandin E(2) in patients with stable and unstable cystic fibrosis. *Free Radic Biol Med.* 2008; 45: 913–919. doi: [10.1016/j.freeradbiomed.2008.06.026](https://doi.org/10.1016/j.freeradbiomed.2008.06.026) PMID: [18634869](https://pubmed.ncbi.nlm.nih.gov/18634869/)
54. Rigas B, Korenberg JR, Merrill WW, Levine L. Prostaglandins E2 and E2 alpha are elevated in saliva of cystic fibrosis patients. *Am J Gastroenterol.* 1989; 84: 1408–1412. PMID: [2816873](https://pubmed.ncbi.nlm.nih.gov/2816873/)
55. Noverr MC, Toews GB, Huffnagle GB. Production of prostaglandins and leukotrienes by pathogenic fungi. *Infect Immun.* 2002; 70: 400–402. PMID: [11748207](https://pubmed.ncbi.nlm.nih.gov/11748207/)
56. Alem MA, Douglas LJ. Prostaglandin production during growth of Candida albicans biofilms. *J Med Microbiol.* 2005; 54: 1001–1005. PMID: [16192429](https://pubmed.ncbi.nlm.nih.gov/16192429/)
57. Wachtler B, Wilson D, Haedicke K, Dalle F, Hube B. From attachment to damage: defined genes of Candida albicans mediate adhesion, invasion and damage during interaction with oral epithelial cells. *PLoS One* 2011; 6: e17046. doi: [10.1371/journal.pone.0017046](https://doi.org/10.1371/journal.pone.0017046) PMID: [21407800](https://pubmed.ncbi.nlm.nih.gov/21407800/)
58. Wachtler B, Citiulo F, Jablonowski N, Forster S, Dalle F, Schaller M, et al. Candida albicans-epithelial interactions: dissecting the roles of active penetration, induced endocytosis and host factors on the infection process. *PLoS One* 2012; 7: e36952. doi: [10.1371/journal.pone.0036952](https://doi.org/10.1371/journal.pone.0036952) PMID: [22606314](https://pubmed.ncbi.nlm.nih.gov/22606314/)
59. Fernandez-Arenas E, Bleck CK, Nombela C, Gil C, Griffiths G, Diez-Orejas R. Candida albicans actively modulates intracellular membrane trafficking in mouse macrophage phagosomes. *Cell Microbiol.* 2009; 11: 560–589. doi: [10.1111/j.1462-5822.2008.01274.x](https://doi.org/10.1111/j.1462-5822.2008.01274.x) PMID: [19134116](https://pubmed.ncbi.nlm.nih.gov/19134116/)
60. Aronoff DM, Canetti C, Peters-Golden M. Prostaglandin E2 inhibits alveolar macrophage phagocytosis through an E-prostanoid 2 receptor-mediated increase in intracellular cyclic AMP. *J Immunol.* 2004; 173: 559–565. PMID: [15210817](https://pubmed.ncbi.nlm.nih.gov/15210817/)
61. Roux D, Gaudry S, Khoy-Ear L, Aloulou M, Phillips-Houlbracq M, Bex J, et al. Airway fungal colonization compromises the immune system allowing bacterial pneumonia to prevail. *Crit Care Med.* 2013; 41: e191–e199. doi: [10.1097/CCM.0b013e31828a25d6](https://doi.org/10.1097/CCM.0b013e31828a25d6) PMID: [23887232](https://pubmed.ncbi.nlm.nih.gov/23887232/)



62. Roux D, Gaudry S, Dreyfuss D, El-Benna J, de Prost N, Denamur E, et al. *Candida albicans* impairs macrophage function and facilitates *Pseudomonas aeruginosa* pneumonia in rat. *Crit Care Med*. 2009; 37: 1062–1067. doi: [10.1097/CCM.0b013e31819629d2](https://doi.org/10.1097/CCM.0b013e31819629d2) PMID: [19237918](https://pubmed.ncbi.nlm.nih.gov/19237918/)
63. Bowman CC, Bost KL. Cyclooxygenase-2-mediated prostaglandin E2 production in mesenteric lymph nodes and in cultured macrophages and dendritic cells after infection with *Salmonella*. *J Immunol*. 2004; 172: 2469–2475. PMID: [14764719](https://pubmed.ncbi.nlm.nih.gov/14764719/)
64. Ejima K, Layne MD, Carvajal IM, Kritek PA, Baron RM, Chen YH, et al. Cyclo-oxygenase-2-deficient mice are resistant to endotoxin-induced inflammation and death. *FASEB J*. 2003; 17: 1325–1327. PMID: [12738799](https://pubmed.ncbi.nlm.nih.gov/12738799/)
65. Sadikot RT, Zeng H, Azim AC, Joo M, Dey SK, Breyer RM, et al. Bacterial clearance of *Pseudomonas aeruginosa* is enhanced by the inhibition of COX-2. *Eur J Immunol*. 2007; 37: 1001–1009. PMID: [17330822](https://pubmed.ncbi.nlm.nih.gov/17330822/)
66. Wang Y, Xu XL. Bacterial peptidoglycan-derived molecules activate *Candida albicans* hyphal growth. *Commun Integr Biol*. 2008; 1: 137–139. PMID: [19704871](https://pubmed.ncbi.nlm.nih.gov/19704871/)
67. Xu XL, Lee RTH, Fang HM, Wang YM, Li R, Zou H, et al. Bacterial peptidoglycan triggers *Candida albicans* hyphal growth by directly activating the adenylyl cyclase Cyr1p. *Cell Host & Microbe* 2008; 4: 28–39.
